# Supplementary material for: An unusual high-frequency ferroelectric obtained via the post-synthetic modification of a metal–organic framework
Source: Royal Society of Chemistry journal article supplement (doi:10.1039/d0dt02066d), 2020-01-01
Supplement: d0dt02066d1.pdf [file d0dt02066d1.pdf]

## Electronic supplementary information

### **An unusual high-frequency ferroelectric via a strategy of post-synthetic modified metal-organic frameworks**

Meiying Liu, Jingjing Liang, Xuebin Xu and Zhiliang Liu \*

Inner Mongolia Key Laboratory of Chemistry and Physics of Rare Earth Materials, School of Chemistry and Chemical Engineering, Inner Mongolia University, Hohhot 010021, China. \*Corresponding author.

Fax/ Tel: +86-471-4992261

E-mail addresses: cezliu@imu.edu.cn

### Contents

Fig. S1 Drawing of the ligand.

Fig. S2 Coordinated environment of  $\text{Cd}^{2+}$  and connection type between metal ions.

Fig. S3 The simulation and PXRD patterns for Cd-MOF.

Fig. S4 EDX mapping of  $(\text{CH}_3)_2\text{NH}\cdot\text{HCl}@$ Cd-MOF.

Fig. S5 TGA curves of Cd-MOF and  $(\text{CH}_3)_2\text{NH}\cdot\text{HCl}@$ Cd-MOF.

Figure S6 Leakage curves of  $(\text{CH}_3)_2\text{NH}\cdot\text{HCl}@$ Cd-MOF.

Fig. S7 Dielectric constant of  $(\text{CH}_3)_2\text{NH}\cdot\text{HCl}@$ Cd-MOF under different frequency in the temperature of 30–270°C.

Fig. S8 DSC curves of Cd-MOF and  $(\text{CH}_3)_2\text{NH}\cdot\text{HCl}@$ Cd-MOF.

Table S1 Crystal data and structure refinement of Cd-MOF.

Table S2 Selected bond lengths [ $\text{\AA}$ ] and angles [ $^\circ$ ] for Cd-MOF.

Table S3 Selected hydrogen bond lengths [ $\text{\AA}$ ] for Cd-MOF.

Table S4 The list of frequency, remnant polarity ( $P_r$ ) and coercive field ( $E_c$ ) in molecule ferroelectrics.

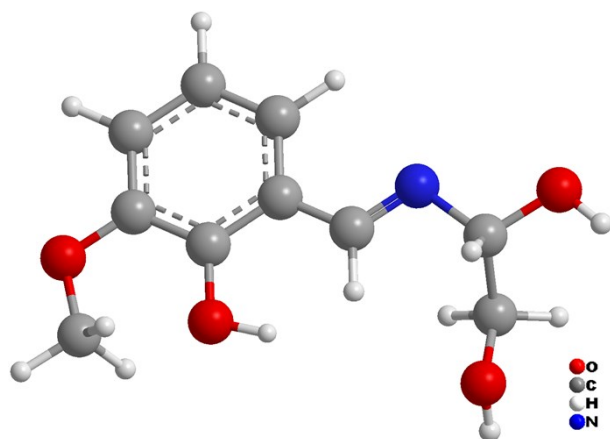

Fig. S1 Drawing of the ligand H<sub>3</sub>L.

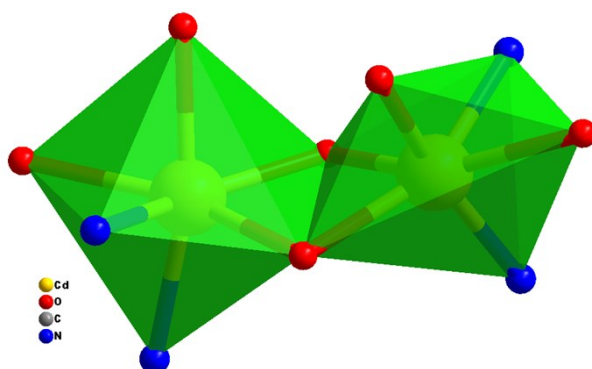

Fig. S2 Coordinated environment of Cd<sup>2+</sup> and connection type between metal ions.

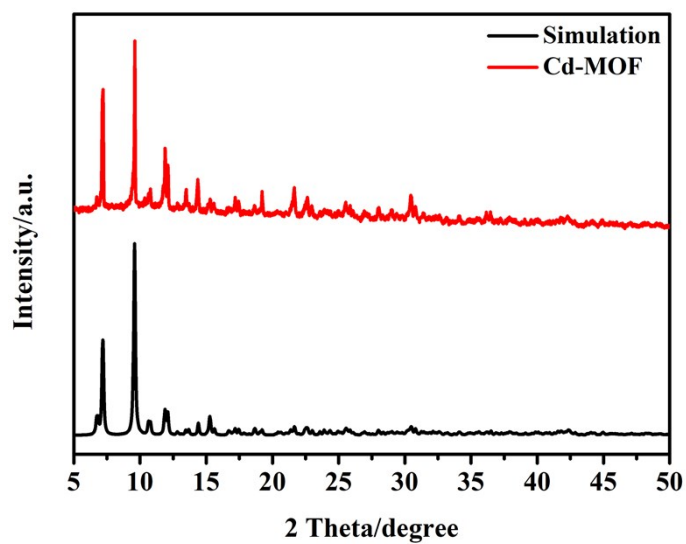

Fig. S3 The simulation and PXRD patterns for Cd-MOF.

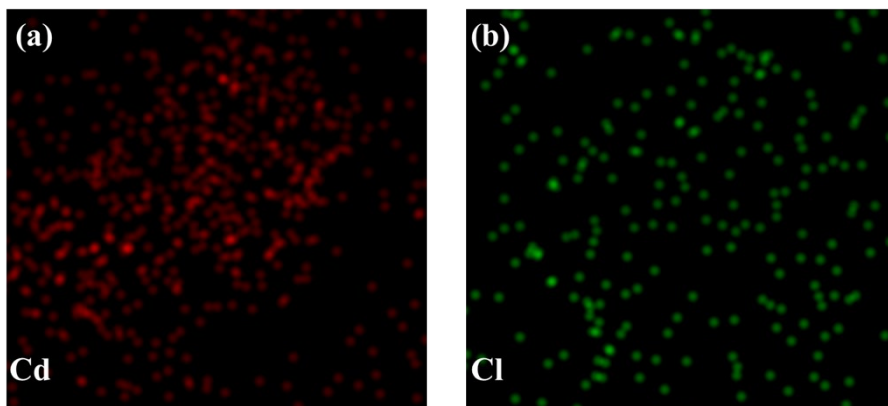

Fig. S4 EDX mapping of  $(\text{CH}_3)_2\text{NH}\cdot\text{HCl}@ \text{Cd-MOF}$ .

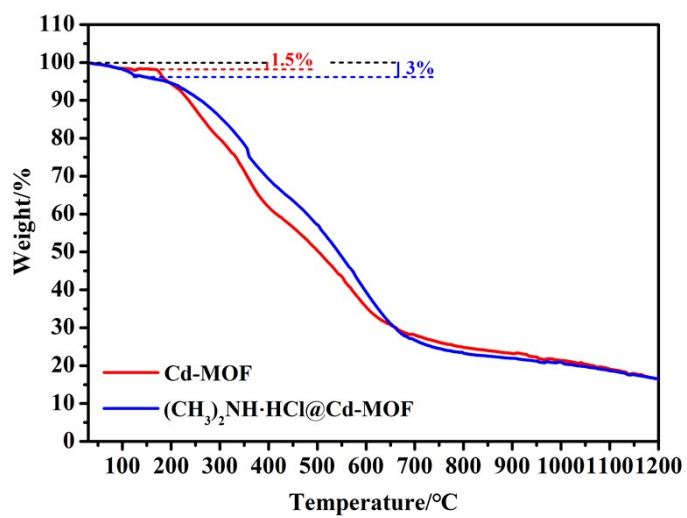

Fig. S5 TGA curves of Cd-MOF and  $(\text{CH}_3)_2\text{NH}\cdot\text{HCl}@ \text{Cd-MOF}$ .

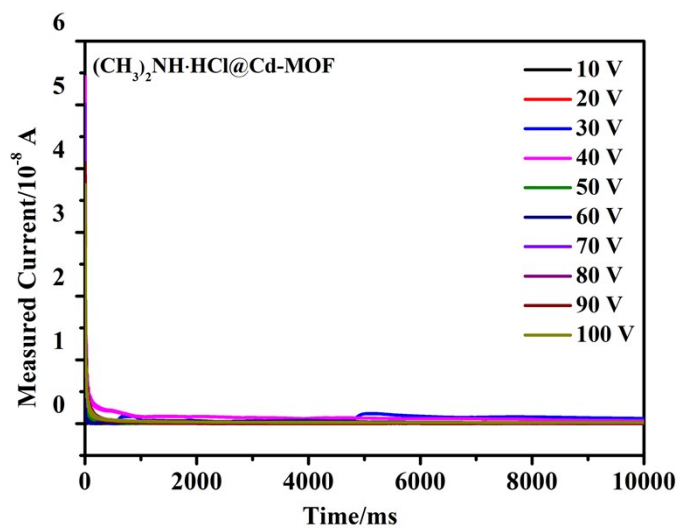

Fig. S6 Leakage curves of  $(\text{CH}_3)_2\text{NH}\cdot\text{HCl}@ \text{Cd-MOF}$ .

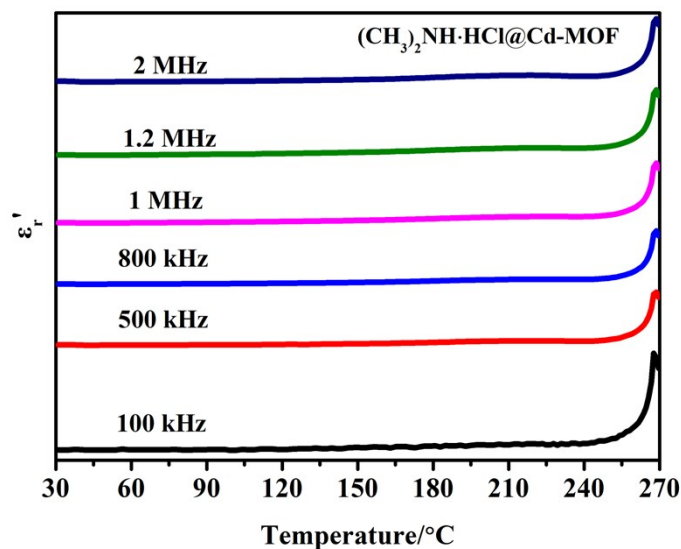

Fig. S7 Dielectric constant of  $(\text{CH}_3)_2\text{NH}\cdot\text{HCl}@ \text{Cd-MOF}$  under different frequency in the temperature of 30–270°C.

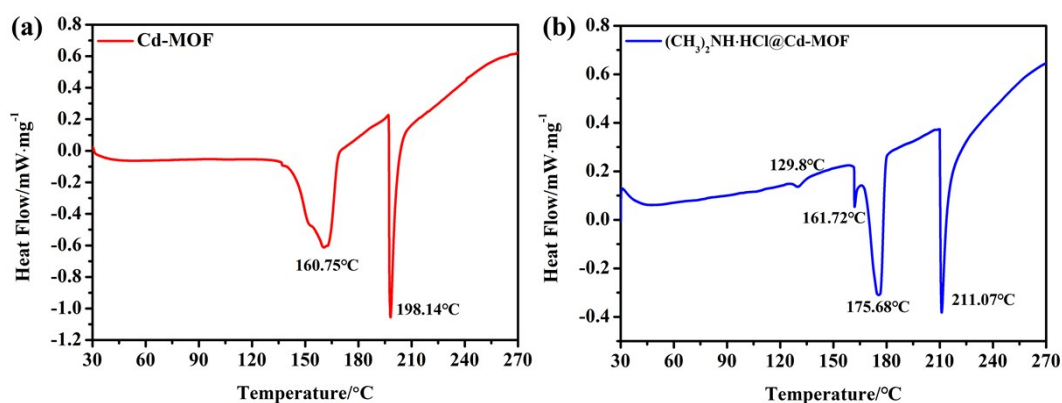

Fig. S8 DSC curves of Cd-MOF and  $(\text{CH}_3)_2\text{NH}\cdot\text{HCl}@ \text{Cd-MOF}$ .

Table S1 Crystal data and structure refinement of Cd-MOF.

| Name              | Cd-MOF                                                         |
|-------------------|----------------------------------------------------------------|
| Empirical formula | $\text{C}_{68}\text{H}_{69}\text{Cd}_4\text{N}_8\text{O}_{24}$ |
| Formula weight    | 1831.91                                                        |
| Temperature/K     | 293.15                                                         |
| Wavelength/Å      | 0.71073                                                        |
| Crystal system    | Monoclinic                                                     |
| space group       | C2                                                             |
| a/Å               | 25.895(2)                                                      |
| b/Å               | 26.301(2)                                                      |
| c/Å               | 12.2932(11)                                                    |
| $\alpha/^\circ$   | 90                                                             |

|                                               |                                    |
|-----------------------------------------------|------------------------------------|
| $\beta/^\circ$                                | 91.478(4)                          |
| $\gamma/^\circ$                               | 90                                 |
| Volume/ $\text{\AA}^3$                        | 8369.7(13)                         |
| Z                                             | 4                                  |
| $\rho_{\text{calc}}/\text{mg}/\text{cm}^3$    | 1.4504                             |
| Absorption coefficient/ $\text{mm}^{-1}$      | 1.074                              |
| F(000)                                        | 3668                               |
| Crystal size/ $\text{mm}^3$                   | 0.03 x 0.02 x 0.01                 |
| Theta range for data collection/ $^\circ$     | 2.95 to 25.02                      |
|                                               | $-30 \leq h \leq 30$               |
| Index ranges                                  | $-31 \leq k \leq 31$               |
|                                               | $-14 \leq l \leq 14$               |
| Reflections collected                         | 148974                             |
| Independent reflections                       | 14755 [R(int) = 0.0543]            |
| Absorption correction                         | Semi-empirical from equivalents    |
| Max. and min. transmission                    | 0.7457 and 0.6435                  |
| Refinement method                             | Full-matrix least-squares on $F^2$ |
| Data/restraints / parameters                  | 14755 / 21 / 960                   |
| Goodness-of-fit on $F^2$                      | 1.051                              |
| Final R indices [ $I > 2\sigma(I)$ ]          | $R_1 = 0.0563$ , $wR_2 = 0.1536$   |
| R indices (all data)                          | $R_1 = 0.0578$ , $wR_2 = 0.1552$   |
| Absolute structure parameter                  | 0.05(4)                            |
| Largest diff. peak/hole / $e \text{\AA}^{-3}$ | 2.93 and -1.59                     |

Table S2 Selected bond lengths [ $\text{\AA}$ ] and angles [ $^\circ$ ] for Cd-MOF.

| Bond lengths ( $\text{\AA}$ ) |           | Bond angles ( $^\circ$ ) |           |
|-------------------------------|-----------|--------------------------|-----------|
| Cd(1)–O(3)#1                  | 2.507(9)  | Cd(3)–N(5)               | 2.387(11) |
| Cd(1)–N(1)#1                  | 2.282(10) | Cd(3)–N(6)               | 2.307(11) |
| Cd(1)–O(2)                    | 2.260(8)  | Cd(3)–O(15)              | 2.446(10) |
| Cd(1)–O(2)#1                  | 2.279(8)  | Cd(3)–O(14)              | 2.264(8)  |
| Cd(1)–O(8)                    | 2.334(9)  | Cd(3)–O(10)              | 2.299(7)  |
| Cd(1)–N(2)                    | 2.390(10) | Cd(3)–O(19)              | 2.354(9)  |
| Cd(2)–N(3)                    | 2.420(7)  | Cd(4)–O(17)#3            | 2.398(9)  |
| Cd(2)–O(6)#2                  | 2.410(9)  | Cd(4)–O(23)#4            | 2.465(9)  |

|             |           |               |           |
|-------------|-----------|---------------|-----------|
| Cd(2)–O(11) | 2.442(9)  | Cd(4)–O(22)   | 2.256(7)  |
| Cd(2)–O(14) | 2.275(8)  | Cd(4)–O(22)#4 | 2.271(8)  |
| Cd(2)–O(10) | 2.275(8)  | Cd(4)–N(7)    | 2.381(10) |
| Cd(2)–N(4)  | 2.300(11) | Cd(4)–N(8)#4  | 2.282(11) |

---

Bond angles (°)

---

|                     |          |                       |           |
|---------------------|----------|-----------------------|-----------|
| N(1)#1–Cd(1)–O(3)#1 | 71.7(3)  | N(5)–Cd(3)–O(15)      | 89.4(3)   |
| N(1)#1–Cd(1)–O(8)   | 86.4(4)  | N(6)–Cd(3)–N(5)       | 86.0(4)   |
| N(1)#1–Cd(1)–N(2)   | 96.3(4)  | N(6)–Cd(3)–O(15)      | 71.7(3)   |
| O(2)–Cd(1)–O(3)#1   | 136.5(3) | N(6)–Cd(3)–O(19)      | 96.9(4)   |
| O(2)#1–Cd(1)–O(3)#1 | 149.7(3) | O(14)–Cd(3)–N(5)      | 97.9(4)   |
| O(2)#1–Cd(1)–N(1)#1 | 80.3(3)  | O(14)–Cd(3)–N(6)      | 80.8(3)   |
| O(2)–Cd(1)–N(1)#1   | 143.7(3) | O(14)–Cd(3)–O(15)     | 152.5(3)  |
| O(2)–Cd(1)–O(2)#1   | 73.7(3)  | O(14)–Cd(3)–O(10)     | 74.3 (3)  |
| O(2)#1–Cd(1)–O(8)   | 109.7(3) | O(14)–Cd(3)–O(19)     | 106.6(3)  |
| O(2)–Cd(1)–O(8)     | 79.2(3)  | O(10)–Cd(3)–N(5)      | 105.4(3)  |
| O(2)#1–Cd(1)–N(2)   | 86.8(3)  | O(10)–Cd(3)–N(6)      | 152.0(3)  |
| O(2)–Cd(1)–N(2)     | 106.9(3) | O(10)–Cd(3)–O(15)     | 132.5 (3) |
| O(8)–Cd(1)–O(3)#1   | 80.2(3)  | O(10)–Cd(3)–O(19)     | 78.5(3)   |
| O(8)–Cd(1)–N(2)     | 163.5(4) | O(19)–Cd(3)–N(5)      | 165.5(4)  |
| N(2)–Cd(1)–O(3)#1   | 85.2(3)  | O(19)–Cd(3)–O(15)     | 78.1(3)   |
| N(3)–Cd(2)–O(11)    | 87.1(2)  | O(17)#3–Cd(4)–O(23)#4 | 80.7(3)   |
| O(6)#2–Cd(2)–N(3)   | 162.0(4) | O(22)–Cd(4)–O(17)#3   | 77.8(3)   |
| O(6)#2–Cd(2)–O(11)  | 77.3(3)  | O(22)#4–Cd(4)–O(17)#3 | 108.9(3)  |
| O(14)–Cd(2)–N(3)    | 107.3(3) | O(22)#4–Cd(4)–O(23)#4 | 150.9 (3) |
| O(14)–Cd(2)–O(6)#2  | 77.9(3)  | O(22)–Cd(4)–O(23)#4   | 134.3(3)  |
| O(14)–Cd(2)–O(11)   | 132.8(3) | O(22)–Cd(4)–O(22)#4   | 74.7(3)   |
| O(14)–Cd(2)–O(10)   | 74.6(3)  | O(22)–Cd(4)–N(7)      | 106.1(3)  |
| O(14)–Cd(2)–N(4)    | 151.4(4) | O(22)#4–Cd(4)–N(7)    | 87.1(3)   |
| O(10)–Cd(2)–N(3)    | 88.9(3)  | O(22)#4–Cd(4)–N(8)#4  | 80.9(3)   |
| O(10)–Cd(2)–O(6)#2  | 109.1(3) | O(22)–Cd(4)–N(8)#4    | 145.2(3)  |
| O(10)–Cd(2)–O(11)   | 152.0(3) | N(7)–Cd(4)–O(17)#3    | 164.0(4)  |
| O(10)–Cd(2)–N(4)    | 80.9(3)  | N(7)–Cd(4)–O(23)#4    | 85.9(3)   |
| N(4)–Cd(2)–N(3)     | 86.6(4)  | N(8)#4–Cd(4)–O(17)#3  | 87.2(4)   |
| N(4)–Cd(2)–O(6)#2   | 96.7(4)  | N(8)#4–Cd(4)–O(23)#4  | 72.0(3)   |
| N(4)–Cd(2)–O(11)    | 71.2(3)  | N(8)#4–Cd(4)–N(7)     | 96.9(4)   |

---

Table S3 Selected hydrogen bond lengths [ $\text{\AA}$ ] for Cd-MOF.

| D   | A     | d(D–H)  | d(H...A) | <DHA    | d(D...A)  |
|-----|-------|---------|----------|---------|-----------|
| O3  | O7 #2 | 0.83(3) | 2.28(12) | 116(11) | 2.748(12) |
| O23 | O18#1 | 0.83(3) | 1.95(10) | 142(15) | 2.653(12) |

D: Donor; A: Acceptor

Symmetry transformations used to generate equivalent atoms: #1: 2–x,y,1–z #2: –1/2+x, 1/2+y, z #3: x –1/2, y–1/2, z #4: 1–x,y,1–z

Table S4 The list of frequency, remnant polarity (Pr) and coercive field (Ec) in molecule ferroelectrics.

| Compounds                                                                                                                          | $f/\text{Hz}$ | $P_r/\mu\text{C}\cdot\text{cm}^{-2}$ | $E_c/\text{kV}\cdot\text{cm}^{-1}$ | Ref.      |
|------------------------------------------------------------------------------------------------------------------------------------|---------------|--------------------------------------|------------------------------------|-----------|
| $(\text{CH}_3)_2\text{NH}\cdot\text{HCl}@ \text{Cd-MOF}$                                                                           | 1000          | 0.17                                 | 1.88                               | This work |
| $^a(\text{CH}_3\text{NH}_3)_{12}[\text{Cu}^{II}_{24}(\text{S,S-hismox})_{12}(\text{OH}_2)_3] \cdot 178\text{H}_2\text{O}$          | 10-200        | 1.06                                 | –                                  | 1         |
| $[\text{Nd}(\text{C}_4\text{H}_5\text{O}_6)(\text{C}_4\text{H}_4\text{O}_6)][3\text{H}_2\text{O}]$                                 | 50            | 0.2                                  | –                                  | 2         |
| $^b\text{R-}[\text{Zn}_4(\text{HL})_2(\text{L})_2(\text{CH}_3\text{OH})_2](\text{NO}_3)_2$                                         | 100           | 6.3                                  | 1.49                               | 3         |
| $^c[\text{Cd}(\text{Imazethapyr})_2]$                                                                                              | 200           | 0.006                                | 1.1                                | 4         |
| $[\text{Cu}_3(4,4\text{-bpy})_5]_2[\text{H}_2\text{SiW}_{11}\text{O}_{39}] \cdot 5\text{H}_2\text{O}$                              | 200           | 0.015                                | 2.2                                | 5         |
| $^d[\text{Cu}_2\text{L}_4(\text{H}_2\text{O})_2] \cdot (\text{ClO}_4)_4 \cdot (\text{H}_2\text{O})_5 \cdot (\text{CH}_3\text{OH})$ | 0.1           | –                                    | 16                                 | 6         |
| $^d[\text{Cu}_3\text{L}_6(\text{H}_2\text{O})_3] \cdot (\text{ClO}_4)_5 \cdot (\text{NO}_3) \cdot (\text{H}_2\text{O})_{11}$       | 0.1           | –                                    | 30                                 | 6         |
| $^e\{[\text{Zn}(\text{TBPR}) \subset 0.25(\text{HClO}_4)](0.25\text{HClO}_4)\}_n$                                                  | 500           | 1.8                                  | 2.5                                | 7         |
| $^f\text{PD-DMACoF}$                                                                                                               | 50            | –                                    | –                                  | 8         |
| $^g[\text{R,R-ZnLDy}(\mu\text{-OAc})(\text{NO}_3)_2]$                                                                              | 1             | –                                    | 17                                 | 9         |
| $^h(\text{DAMP})_3(\text{Cu}_4\text{Br}_4)_2(\text{H}_2\text{O})_3$                                                                | 12            | 2.5                                  | 1.0                                | 10        |

$^a\text{H}_2\text{Me}_2\text{-}(\text{S,S})\text{-hismox}$  = bis[(S)-histidine]oxalyl diamide,  $^b\text{H}_2\text{L}$  = 2-[(1-benzyl-2-hydroxy-ethylimino)-methyl]-6-methoxy-phenol,  $^c\text{H-Imazethapyr}$  = 2-(4,5-dihydro-4-methyl-4-(1-methylethyl)-5-oxo-1H-imidazol-2-yl)-5-ethyl-3-pyridine-carboxylic acid,  $^d\text{L}$  = PhPO(NH-3-pyridyl)<sub>2</sub>,  $^e\text{TBPR}$  = (S)-N-2-tetrazoylbenzylproline,  $^f\text{PD-DMA}$  = perdeuterodimethylammonium,  $^g\text{H}_2\text{L}$  = phenol,2,2-[2,2-diphenyl-1,2-ethanediyl]bis[(E)-nitrilomethyl-idyne]-bis(6-methoxy),  $^h\text{DAMP}$  = (S)-1,4-diallyl-2-methylpiperazine

## References

- 1 Mon, M.; Ferrando-Soria, J.; Verdaguer, M.; Train, C.; Paillard, C.; Dkhil, B.; Versace, C.; Bruno, R.; Armentano, D.; Pardo, E., Postsynthetic Approach for the Rational Design of Chiral Ferroelectric Metal-Organic Frameworks. *J. Am. Chem. Soc.* 2017, **139**, 8098-8101.
- 2 Ahmad, B. Z.; Want, B., Structure, Ferroelectric Ordering, and Semiempirical Quantum Calculations of Lanthanide Based Metal-Organic Framework:  $[\text{Nd}(\text{C}_4\text{H}_5\text{O}_6)(\text{C}_4\text{H}_4\text{O}_6)][3\text{H}_2\text{O}]$ . *J. Appl. Phys.* 2016, **119**, 144104.
- 3 Yu, H.; Liu, M.; Gao, X.; Liu, Z., Construction and Crystal Structure of a Pair of Tetranuclear Zn(II) Chiral Clusters that Exhibit Ferroelectric Behavior Under a Higher Frequency Electric Field at Room Temperature. *Polyhedron* 2017, **137**, 217-221.

- 4 Fu, D. W.; Zhang, W.; Xiong, R. G., The First Metal-Organic Framework (MOF) of Imazethapyr and Its SHG, Piezoelectric and Ferroelectric Properties. *Dalton Trans.* 2008, 3946-3948.
- 5 Zheng, S. T.; Yang, G. Y., The First Polyoxometalate-Templated Four-Fold Interpenetrated Coordination Polymer with New Topology and Ferroelectricity. 2010, **39**, 700-703.
- 6 Srivastava, A. K.; Praveenkumar, B.; Mahawar, I. K.; Divya, P.; Shalini, S.; Boomishankar, R., Anion Driven [Cu<sup>II</sup>L<sub>2</sub>]<sub>n</sub> Frameworks: Crystal Structures, Guest-Encapsulation, Dielectric, and Possible Ferroelectric Properties. *Chem. Mater.* 2014, **26**, 3811-3817.
- 7 Hang, T.; Fu, D.-W.; Ye, Q.; Ye, H.-Y.; Xiong, R.-G.; Huang, S. D., Tanklike Metal–Organic Framework Filled with Perchloric Acid and Its Dielectric–Ferroelectric Properties. *Cryst. Growth Des.* 2009, **9**, 2054-2056.
- 8 Fu, D. W.; Zhang, W.; Cai, H. L.; Zhang, Y.; Ge, J. Z.; Xiong, R. G.; Huang, S. D.; Nakamura, T., A Multiferroic Perdeutero Metal-Organic Framework. *Angew. Chem. Int. Ed.* 2011, **50**, 11947-11951.
- 9 Long, J.; Rouquette, J.; Thibaud, J. M.; Ferreira, R. A.; Carlos, L. D.; Donnadiou, B.; Vieru, V.; Chibotaru, L. F.; Konczewicz, L.; Haines, J.; Guari, Y.; Larionova, J., A High-Temperature Molecular Ferroelectric Zn/Dy Complex Exhibiting Single-Ion-Magnet behavior and lanthanide luminescence. *Angew. Chem. Int. Ed.* 2015, **54**, 2236-2240.
- 10 Zhang, W.; Xiong, R.-G.; Huang, S. D., 3D Framework Containing Cu<sub>4</sub>Br<sub>4</sub> Cubane as Connecting Node with Strong Ferroelectricity. *J. Am. Chem. Soc.* 2008, **130**, 10468-10469.
